# Supplementary material
Source: PubMed Central journal article supplement (PMC7918188)
Supplement: bloodBLD2020006892-suppl1.pdf [file bloodBLD2020006892-suppl1.pdf]

**Supplement Table 1. Pomalidomide dose modification protocol rules**

| <b>Common Terminology Criteria (CTCAE) Version 4.0</b> | <b>Adverse Event</b>                                                                           | <b>Dose Change for Pomalidomide</b>                                                                                                                                                                            |
|--------------------------------------------------------|------------------------------------------------------------------------------------------------|----------------------------------------------------------------------------------------------------------------------------------------------------------------------------------------------------------------|
| Allergy/Immunology                                     | Allergic reaction/hypersensitivity (including drug fever) - Grade 2                            | Hold study drug until resolved to < Grade 1; Decrease dose by 1 dose level                                                                                                                                     |
|                                                        | Allergic reaction/ hypersensitivity (including drug fever) - Grade 3 or 4                      | Discontinue Study Drug                                                                                                                                                                                         |
| Blood/Bone Marrow                                      | Neutropenia (ANC) - Grade 3 with fever or Grade 4                                              | Hold study drug until < Grade 2; Decrease dose by 1 dose level                                                                                                                                                 |
|                                                        | Thrombocytopenia - Grade 3 or 4                                                                | Hold study drug until < Grade 2; Decrease dose by 1 dose level                                                                                                                                                 |
|                                                        | Anemia – Grade 3 or 4                                                                          | Hold study drug and treat anemia as needed until Hgb within 0.5 g/dl of lower limit of normal; Decrease dose by one dose level                                                                                 |
| Cardiac Arrhythmia                                     | Grade 2                                                                                        | Hold study drug until resolved to < Grade 1; Decrease dose by 1 dose level                                                                                                                                     |
|                                                        | Grade 3 or 4                                                                                   | Discontinue study drug                                                                                                                                                                                         |
| Prolonged QTc Interval                                 | Grade 3 (<0.50 second)                                                                         | Hold study drug; decrease dose by 1 dose level and restart when resolved to < Grade 2                                                                                                                          |
|                                                        | Grade 4 (>0.5 second, life threatening symptoms)                                               | Discontinue study drug                                                                                                                                                                                         |
| Vascular                                               | Thrombosis/embolism - Grade 2, 3 or 4                                                          | Discontinue study drug                                                                                                                                                                                         |
| Dermatology/Skin                                       | Rash non-desquamation - Grade 3                                                                | Hold study drug until resolved to < Grade 1. Decrease dose by 1 dose level                                                                                                                                     |
|                                                        | Rash non-desquamation - Grade 4                                                                | Discontinue study drug                                                                                                                                                                                         |
|                                                        | Rash/desquamation - Grade 3, 4                                                                 | Discontinue study drug                                                                                                                                                                                         |
|                                                        | Rash/desquamation - Grade 2                                                                    | The dose may be modified or discontinued at the investigator's discretion.                                                                                                                                     |
|                                                        | Rash Erythema multiforme                                                                       | Discontinue study drug                                                                                                                                                                                         |
| Endocrine                                              | Elevated or Reduced Thyroid Function Test results without symptoms of hyper- or hypothyroidism | Confirm test results and if significant, refer for therapy; Do not alter study drug regimen                                                                                                                    |
|                                                        | Elevated or Reduced Thyroid Function Test results with symptoms of hyper- or hypothyroidism    | Hold study drug; Evaluate etiology and refer for appropriate therapy; Restart at the prior dose once symptoms have resolved and thyroid function has been stabilized with medical and/or surgical intervention |
| Neurology                                              | Neuropathy cranial/motor/sensory - Grade 2                                                     | Hold study drug; Restart at same or 1 dose level lower once event has resolved to < Grade 1                                                                                                                    |
|                                                        | Neuropathy cranial/motor/sensory Grade 3 or recurrence of Grade 2                              | Hold study drug until resolved to < Grade 1; Decrease dose by 1 dose level                                                                                                                                     |
|                                                        | Neuropathy cranial/motor/sensory - Grade 4                                                     | Discontinue study drug                                                                                                                                                                                         |
| Other pomalidomide related toxicity                    | Grade 3 or Grade 4                                                                             | Hold pomalidomide therapy; Decrease dose by 1 dose level and restart when resolved to < Grade 2                                                                                                                |

**Supplement Table 2.** List of antibodies with manufactures used in analysis by flow cytometry

| Antibody | Manufacturer            | Clone                          |
|----------|-------------------------|--------------------------------|
| CD45     | Biolegend 304006        | CD45 FITC (clone HI30)         |
| CD56     | BD 555516               | CD56 PE (clone B159)           |
| CD16     | Biolegend 302028        | CD16 PerCP-Cy5.5 (clone 3G8)   |
| CD14     | FisherSci 25-0149-42    | CD14 PE-Cy7 (clone 61D3)       |
| CD19     | Biolegend 302212        | CD19 APC (clone HIB19)         |
| CD3      | BD 557943               | CD3 Alexa700 (clone UCHT-1)    |
| CD4      | Biolegend 300518        | CD4 APC-Cy7 (clone RPA-T4)     |
| CD8      | Ebio 48-0088-42         | CD8 e450 (clone RPA-T8)        |
|          |                         |                                |
| CD31     | Ebio 11-0319-42         | CD31 FITC (clone WM-59)        |
| CCR7     | BD 560765               | CCR7 PE (clone 150503)         |
| CD45RA   | Beckman Coulter IM2711U | CD45RA ECD (clone 2H4)         |
| CD39     | Ebio 46-0399-42         | CD39 PerCP-e710 (clone eBioA1) |
| CD25     | Ebio 25-0259-42         | CD25 PE-Cy7 ((clone BC96)      |
| CD127    | Ebio 17-1278-41         | CD127 APC (clone eBioRDR5)     |
| CD3      | BD 557943               | CD3 Alexa700 (clone UCHT-1)    |
| CD27     | Ebioscience 47-0279-42  | CD27 APC-e780 (clone O323)     |
| CD8      | Ebio 48-0088-42         | CD8 e450 (clone RPA-T8)        |
| CD4      | Biolegend 317444        | CD4 bv510 (clone OKT4)         |
|          |                         |                                |
| IgD      | BD 555778               | IgD FITC (clone IA6-2)         |
| CD21     | Biolegend 354904        | CD21 PE (clone Bu32)           |
| CD20     | Beckman Coulter IM3607U | CD20 ECD (clone B9E9)          |
| CD10     | Biolegend 312216        | CD10 PerCP-Cy5.5 (clone HI10a) |
| CD24     | BD 561646               | CD24 PE-Cy7 (clone ML5)        |
| CD38     | Biolegend 303510        | CD38 APC (clone HIT2)          |
| CD3      | BD 557943               | CD3 Alexa700 (clone UCHT-1)    |
| CD27     | Ebioscience 47-0279-42  | CD27 APC-e780 (clone O323)     |
| CD11c    | Biolegend 301628        | CD11c bv421 (clone 3.9)        |
| CD19     | Biolegend 302242        | CD19 bv510 (clone HIB19)       |
|          |                         |                                |
| CCR7     | BD 561271               | CCR7 FITC (clone 150503)       |
| ICOS     | BD 557802               | ICOS PE (clone DX29)           |
| CD4      | Biolegend 317448        | CD4 PE-DAZZLE (clone OKT4)     |
| CD39     | Ebio 46-0399-42         | CD39 PerCP-e710 (clone eBioA1) |
| CD25     | Ebio 25-0259-42         | CD25 PE-Cy7 (clone BC96)       |
| FoxP3    | Ebio 13-4777-82         | FoxP3 biotin (clone 236A/E7)   |
| CD3      | BD 557943               | CD3 Alexa700 (clone UCHT-1)    |
| CD45RA   | FisherSci 50-245-971    | CD45RA APC-e780 (clone HI100)  |
| Ki-67    | Ebio 48-5699-42         | Ki-67 e450 (clone 20Raj1)      |









**Supplement Figure 1.** Example of patient with improvement in cGvHD-related sclerosis after one year of pomalidomide.

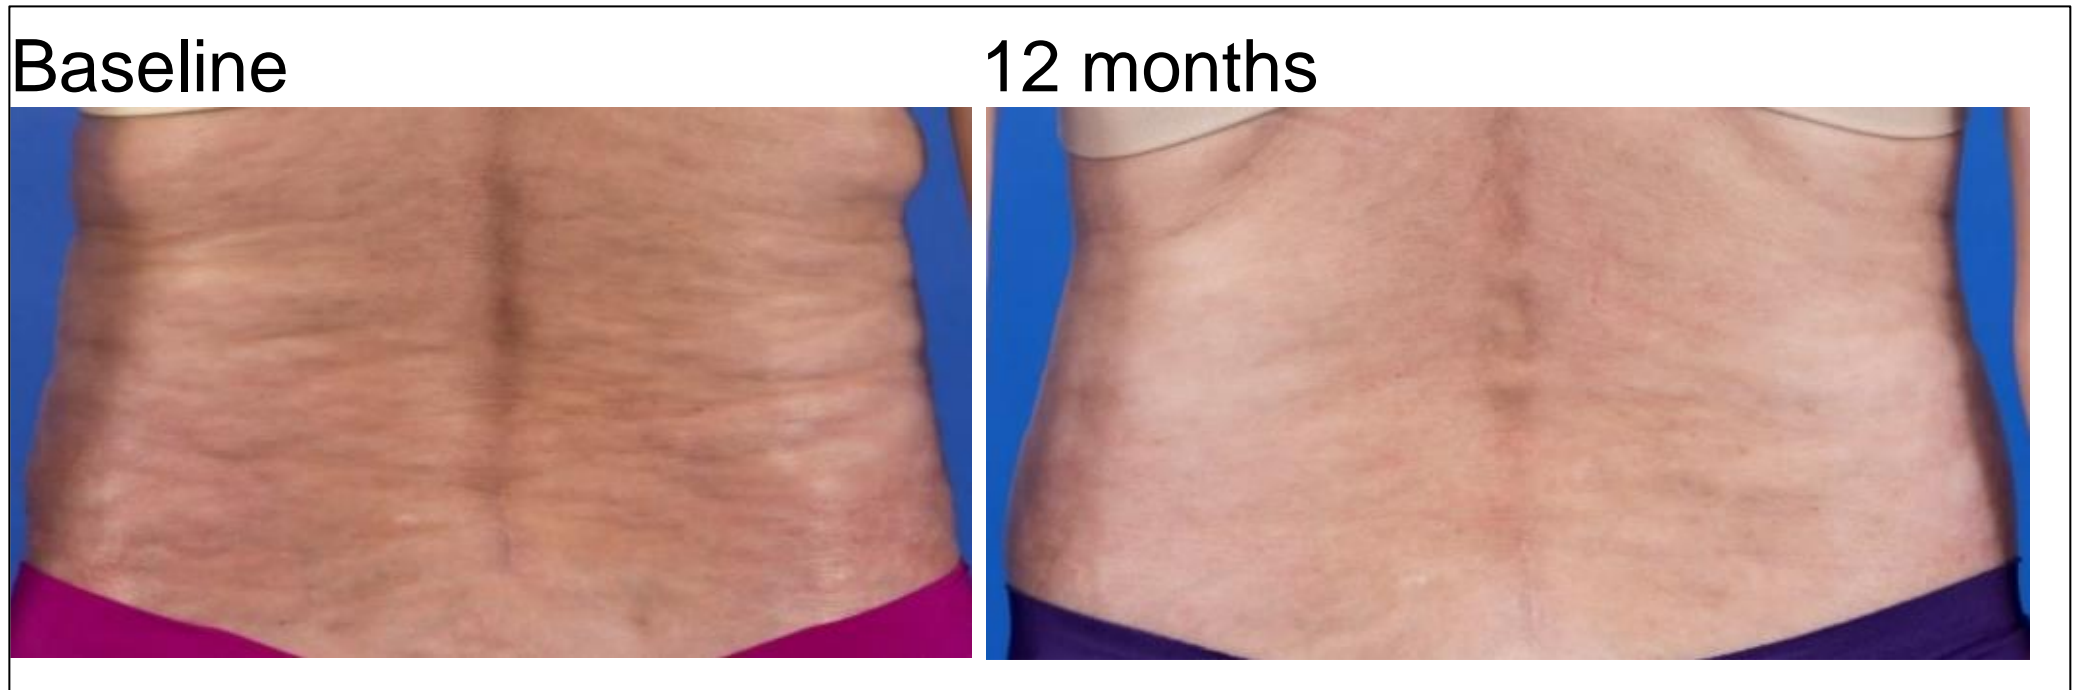

Supplement Figure 1. Picture on the left side shows sclerotic chronic graft-*versus*-host (cGvHD) skin involvement at baseline. Picture on the right side shows improvement in cGvHD of involved skin after 12 months on pomalidomide therapy.

**Supplement Table 7.** Number (proportion) of patients experiencing adverse event recorded according to CTCAE criteria version 4 (excluding serious).

| Adverse Event*                              | High-dose group     | Low-dose group      |
|---------------------------------------------|---------------------|---------------------|
|                                             | Number (Percent)    | Number (Percent)    |
| <b>Total</b>                                | <b>17/17 (100%)</b> | <b>17/17 (100%)</b> |
| <b>Blood and lymphatic system disorders</b> |                     |                     |
| Anemia                                      | 2/17 (12%)          | 3/17 (18%)          |
| Hemolysis                                   | 1/17 (6%)           | 0/17 (0%)           |
| <b>Cardiac disorders</b>                    |                     |                     |
| ST depression                               | 0/17 (0%)           | 1/17 (6%)           |
| Sinus bradycardia                           | 1/17 (6%)           | 0/17 (0%)           |
| Sinus tachycardia                           | 1/17 (6%)           | 0/17 (0%)           |
| <b>Ear and labyrinth disorders</b>          |                     |                     |
| Hearing impaired                            | 0/17 (0%)           | 2/17 (12%)          |
| <b>Eye disorders</b>                        |                     |                     |
| Blurred vision**                            | 2/17 (12%)          | 2/17 (12%)          |
| Dry eye**                                   | 2/17 (12%)          | 2/17 (12%)          |
| Glaucoma                                    | 0/17 (0%)           | 1/17 (6%)           |
| Photophobia                                 | 0/17 (0%)           | 1/17 (6%)           |
| Retinal vascular disorder                   | 0/17 (0%)           | 1/17 (6%)           |
| <b>Gastrointestinal disorders</b>           |                     |                     |
| Constipation                                | 2/17 (12%)          | 0/17 (0%)           |
| Diarrhea**                                  | 4/17 (24%)          | 2/17 (12%)          |
| Dry mouth**                                 | 2/17 (12%)          | 0/17 (0%)           |
| Esophageal ulcer**                          | 0/17 (0%)           | 1/17 (6%)           |
| Gastroesophageal reflux disease**           | 1/17 (6%)           | 2/17 (12%)          |
| Reflux + fullness**                         | 0/17 (0%)           | 1/17 (6%)           |
| Mucositis oral**                            | 1/17 (6%)           | 0/17 (0%)           |
| Nausea**                                    | 3/17 (18%)          | 2/17 (12%)          |
| Oral pain**                                 | 1/17 (6%)           | 0/17 (0%)           |
| Toothache                                   | 1/17 (6%)           | 0/17 (0%)           |
| Vomiting**                                  | 1/17 (6%)           | 1/17 (6%)           |
| <b>General disorders</b>                    |                     |                     |
| Edema limbs                                 | 3/17 (18%)          | 4/17 (24%)          |
| Fatigue**                                   | 10/17 (59%)         | 3/17 (18%)          |
| Flu like symptoms                           | 0/17 (0%)           | 2/17 (12%)          |
| Pain**                                      | 0/17 (0%)           | 1/17 (6%)           |



| Adverse Event*                                         | High-dose group  | Low-dose group   |
|--------------------------------------------------------|------------------|------------------|
|                                                        | Number (Percent) | Number (Percent) |
| <b>Immune system disorders</b>                         |                  |                  |
| Throat tightness, dry mouth, pruritus**                | 1/17 ( 6%)       | 0/17 (0%)        |
| <b>Infections and infestations</b>                     |                  |                  |
| Bronchial infection                                    | 1/17 ( 6%)       | 0/17 (0%)        |
| CMV reactivation                                       | 1/17 ( 6%)       | 0/17 (0%)        |
| Lung infection                                         | 4/17 (24%)       | 3/17 (18%)       |
| Sinusitis                                              | 3/17 (18%)       | 0/17 (0%)        |
| Skin infection                                         | 1/17 ( 6%)       | 2/17 (12%)       |
| Urinary tract infection                                | 1/17 ( 6%)       | 0/17 (0%)        |
| <b>Injury, poisoning and procedural complications</b>  |                  |                  |
| Spinal fracture                                        | 0/17 (0%)        | 1/17 ( 6%)       |
| <b>Investigations</b>                                  |                  |                  |
| Alanine aminotransferase increased**                   | 2/17 (12%)       | 1/17 ( 6%)       |
| Aspartate aminotransferase increased**                 | 0/17 (0%)        | 1/17 ( 6%)       |
| Creatinine increased                                   | 0/17 (0%)        | 3/17 (18%)       |
| Lymphocyte count decreased                             | 10/17 (59%)      | 8/17 (47%)       |
| Lymphocyte count increased                             | 0/17 (0%)        | 1/17 ( 6%)       |
| Neutrophil count decreased                             | 6/17 (53%)       | 2/17 (12%)       |
| Weight loss**                                          | 1/17 ( 6%)       | 0/17 (0%)        |
| White blood cell decreased                             | 2/17 (12%)       | 2/17 (12%)       |
| <b>Metabolism and nutrition disorders</b>              |                  |                  |
| Hyperglycemia                                          | 2/17 (12%)       | 0/17 (0%)        |
| Hyperkalemia                                           | 2/17 (12%)       | 1/17 ( 6%)       |
| Hypermagnesemia                                        | 0/17 (0%)        | 1/17 ( 6%)       |
| Hyperuricemia                                          | 0/17 (0%)        | 1/17 ( 6%)       |
| Hypoalbuminemia                                        | 2/17 (12%)       | 3/17 (18%)       |
| Hypocalcemia                                           | 0/17 (0%)        | 1/17 ( 6%)       |
| Hypokalemia                                            | 1/17 ( 6%)       | 0/17 (0%)        |
| Hypophosphatemia                                       | 9/17 (53%)       | 4/17 (24%)       |
| <b>Musculoskeletal and connective tissue disorders</b> |                  |                  |
| Arthralgia**                                           | 2/17 (12%)       | 1/17 ( 6%)       |
| Back pain                                              | 0/17 (0%)        | 1/17 ( 6%)       |
| Generalized muscle weakness**                          | 1/17 ( 6%)       | 0/17 (0%)        |
| Joint range of motion decreased**                      | 1/17 ( 6%)       | 1/17 ( 6%)       |
| Joint range of motion decreased cervical spine**       | 1/17 ( 6%)       | 0/17 (0%)        |
| L. plantar fasciitis**                                 | 0/17 (0%)        | 1/17 ( 6%)       |

| Adverse Event*                                         | High-dose group  | Low-dose group   |
|--------------------------------------------------------|------------------|------------------|
|                                                        | Number (Percent) | Number (Percent) |
| Myalgia/Muscle cramps**                                | 4/17 (24%)       | 1/17 ( 6%)       |
| Myositis                                               | 0/17 (0%)        | 1/17 ( 6%)       |
| Neck pain**                                            | 1/17 ( 6%)       | 0/17 (0%)        |
| Non-cardiac chest pain                                 | 0/17 (0%)        | 1/17 ( 6%)       |
| Pain in extremity**                                    | 2/17 (12%)       | 1/17 ( 6%)       |
| <b>Nervous system disorders</b>                        |                  |                  |
| Amnesia                                                | 1/17 ( 6%)       | 0/17 (0%)        |
| Dizziness                                              | 2/17 (12%)       | 2/17 (12%)       |
| Dysesthesia                                            | 1/17 ( 6%)       | 0/17 (0%)        |
| Dysphasia                                              | 1/17 ( 6%)       | 0/17 (0%)        |
| Headache                                               | 0/17 (0%)        | 2/17 (12%)       |
| Memory impairment                                      | 1/17 ( 6%)       | 1/17 ( 6%)       |
| Peripheral sensory neuropathy**                        | 1/17 ( 6%)       | 1/17 ( 6%)       |
| Syncope                                                | 0/17 (0%)        | 1/17 ( 6%)       |
| Tremor                                                 | 5/17 (29%)       | 1/17 ( 6%)       |
| <b>Psychiatric disorders</b>                           |                  |                  |
| Depression                                             | 1/17 ( 6%)       | 0/17 (0%)        |
| Insomnia                                               | 1/17 ( 6%)       | 1/17 ( 6%)       |
| <b>Renal and urinary disorders</b>                     |                  |                  |
| Urinary frequency                                      | 2/17 (12%)       | 0/17 (0%)        |
| <b>Reproductive system and breast disorders</b>        |                  |                  |
| Testicular pain                                        | 1/17 ( 6%)       | 0/17 (0%)        |
| Vaginal inflammation                                   | 1/17 ( 6%)       | 0/17 (0%)        |
| <b>Respiratory, thoracic and mediastinal disorders</b> |                  |                  |
| Dyspnea**                                              | 2/17 (12%)       | 1/17 ( 6%)       |
| Epistaxis                                              | 0/17 (0%)        | 1/17 ( 6%)       |
| Forced expiratory volume decreased**                   | 1/17 ( 6%)       | 2/17 (12%)       |
| Nasal congestion                                       | 1/17 ( 6%)       | 1/17 ( 6%)       |
| Upper respiratory infection                            | 7/17 (41%)       | 9/17 (53%)       |
| <b>Skin and subcutaneous tissue disorders</b>          |                  |                  |
| Bullous dermatitis**                                   | 1/17 ( 6%)       | 2/17 (12%)       |
| Dry skin**                                             | 1/17 ( 6%)       | 0/17 (0%)        |
| Hyperhidrosis                                          | 1/17 ( 6%)       | 0/17 (0%)        |
| Pain of skin**                                         | 0/17 (0%)        | 3/17 (18%)       |
| Pruritus**                                             | 0/17 (0%)        | 1/17 ( 6%)       |
| Rash maculo-papular**                                  | 5/17 (29%)       | 5/17 (29%)       |

| Adverse Event*                                                                                                                                                                          | High-dose group  | Low-dose group   |
|-----------------------------------------------------------------------------------------------------------------------------------------------------------------------------------------|------------------|------------------|
|                                                                                                                                                                                         | Number (Percent) | Number (Percent) |
| Increased plaques**                                                                                                                                                                     | 1/17 ( 6%)       | 0/17 (0%)        |
| Leg wounds**                                                                                                                                                                            | 0/17 (0%)        | 1/17 ( 6%)       |
| Upper extremity and leg tightness**                                                                                                                                                     | 0/17 (0%)        | 1/17 ( 6%)       |
| Skin ulceration**                                                                                                                                                                       | 1/17 ( 6%)       | 3/17 (18%)       |
| <b>Vascular disorders</b>                                                                                                                                                               |                  |                  |
| Hypertension                                                                                                                                                                            | 2/17 (12%)       | 3/17 (18%)       |
| Hypotension                                                                                                                                                                             | 1/17 ( 6%)       | 1/17 ( 6%)       |
| *Multiple occurrences of the same adverse event in 1 patient were counted only once per preferred term. Only grade $\geq 2$ adverse events were recorded. ** Possibly related to cGVHD. |                  |                  |

**Supplement Table 8.** Number of patients experiencing serious adverse events recorded according to CTCAE criteria version 4

| Serious Adverse Event <sup>*,**</sup>                       | High-dose group  | Low-dose group   |
|-------------------------------------------------------------|------------------|------------------|
|                                                             | Number (Percent) | Number (Percent) |
| <b>Total</b>                                                | 11/17 (65%)      | 8/17 (47%)       |
| <b>Blood and lymphatic system disorders</b>                 |                  |                  |
| Anemia                                                      | 1/17 ( 6%)       | 0/17 (0%)        |
| <b>Cardiac disorders</b>                                    |                  |                  |
| Chest pain - cardiac                                        | 0/17 (0%)        | 1/17 ( 6%)       |
| Sinus bradycardia                                           | 1/17 ( 6%)       | 0/17 (0%)        |
| <b>Eye disorders</b>                                        |                  |                  |
| Retinopathy                                                 | 0/17 (0%)        | 1/17 ( 6%)       |
| <b>Gastrointestinal disorders</b>                           |                  |                  |
| Duodenal ulcer <sup>***</sup>                               | 1/17 ( 6%)       | 0/17 (0%)        |
| Gastroenteritis <sup>***</sup>                              | 0/17 (0%)        | 1/17 ( 6%)       |
| <b>General disorders</b>                                    |                  |                  |
| Fever                                                       | 0/17 (0%)        | 1/17 ( 6%)       |
| <b>Infections and infestations</b>                          |                  |                  |
| Bronchial infection                                         | 1/17 ( 6%)       | 1/17 ( 6%)       |
| CMV reactivation                                            | 0/17 (0%)        | 1/17 ( 6%)       |
| Lung infection                                              | 2/17 (12%)       | 5/17 (29%)       |
| Salivary gland infection                                    | 1/17 ( 6%)       | 0/17 (0%)        |
| Sepsis                                                      | 1/17 ( 6%)       | 0/17 (0%)        |
| Skin infection                                              | 1/17 ( 6%)       | 2/17 (12%)       |
| Wound infection                                             | 0/17 (0%)        | 2/17 (12%)       |
| <b>Injury, poisoning and procedural complications</b>       |                  |                  |
| Fall                                                        | 0/17 (0%)        | 1/17 ( 6%)       |
| <b>Investigations</b>                                       |                  |                  |
| Alanine aminotransferase increased                          | 1/17 ( 6%)       | 0/17 (0%)        |
| Alkaline phosphatase increased                              | 1/17 ( 6%)       | 0/17 (0%)        |
| Aspartate aminotransferase increased                        | 1/17 ( 6%)       | 0/17 (0%)        |
| Carbon monoxide diffusing capacity decreased <sup>***</sup> | 2/17 (12%)       | 0/17 (0%)        |
| Neutrophil count decreased                                  | 1/17 ( 6%)       | 0/17 (0%)        |
| <b>Metabolism and nutrition disorders</b>                   |                  |                  |
| Dehydration                                                 | 0/17 (0%)        | 2/17 (12%)       |
| Hyperkalemia                                                | 1/17 ( 6%)       | 0/17 (0%)        |
| <b>Musculoskeletal and connective tissue disorders</b>      |                  |                  |
| Generalized muscle weakness <sup>***</sup>                  | 1/17 ( 6%)       | 0/17 (0%)        |
| Muscle weakness lower limb <sup>***</sup>                   | 0/17 (0%)        | 1/17 ( 6%)       |
| <b>Nervous system disorders</b>                             |                  |                  |
| Syncope                                                     | 1/17 ( 6%)       | 0/17 (0%)        |
| <b>Renal and urinary disorders</b>                          |                  |                  |
| Acute kidney injury                                         | 0/17 (0%)        | 1/17 ( 6%)       |
| <b>Respiratory, thoracic and mediastinal disorders</b>      |                  |                  |
| Hypoxia <sup>***</sup>                                      | 1/17 ( 6%)       | 1/17 ( 6%)       |
| <b>Skin and subcutaneous tissue disorders</b>               |                  |                  |

| Serious Adverse Event <sup>*,**</sup>                                                                                                                                                                                                                                                                                                                                                                                                                                                                                                                                                                                                                                                                                                                                                                                                                                                                                                                                                                                                                                                     | High-dose group  | Low-dose group   |
|-------------------------------------------------------------------------------------------------------------------------------------------------------------------------------------------------------------------------------------------------------------------------------------------------------------------------------------------------------------------------------------------------------------------------------------------------------------------------------------------------------------------------------------------------------------------------------------------------------------------------------------------------------------------------------------------------------------------------------------------------------------------------------------------------------------------------------------------------------------------------------------------------------------------------------------------------------------------------------------------------------------------------------------------------------------------------------------------|------------------|------------------|
|                                                                                                                                                                                                                                                                                                                                                                                                                                                                                                                                                                                                                                                                                                                                                                                                                                                                                                                                                                                                                                                                                           | Number (Percent) | Number (Percent) |
| Rash maculo-papular <sup>***</sup>                                                                                                                                                                                                                                                                                                                                                                                                                                                                                                                                                                                                                                                                                                                                                                                                                                                                                                                                                                                                                                                        | 0/17 (0%)        | 1/17 ( 6%)       |
| <b>Vascular disorders</b>                                                                                                                                                                                                                                                                                                                                                                                                                                                                                                                                                                                                                                                                                                                                                                                                                                                                                                                                                                                                                                                                 |                  |                  |
| Hypotension                                                                                                                                                                                                                                                                                                                                                                                                                                                                                                                                                                                                                                                                                                                                                                                                                                                                                                                                                                                                                                                                               | 1/17 ( 6%)       | 2/17 (12%)       |
| Thromboembolic event                                                                                                                                                                                                                                                                                                                                                                                                                                                                                                                                                                                                                                                                                                                                                                                                                                                                                                                                                                                                                                                                      | 1/17 ( 6%)       | 0/17 (0%)        |
| <p>* Multiple occurrences of the same serious adverse event in 1 patient were counted only once per preferred term.</p> <p>** An adverse event or suspected adverse reaction was considered serious if in the view of the investigator or the sponsor, it results in any of the following:</p> <ul style="list-style-type: none"> <li>• Death,</li> <li>• A life-threatening adverse drug experience</li> <li>• Inpatient hospitalization or prolongation of existing hospitalization</li> <li>• Persistent or significant incapacity or substantial disruption of the ability to conduct normal life functions</li> <li>• A congenital anomaly/birth defect.</li> <li>• Important medical events that may not result in death, be life-threatening, or require hospitalization may be considered a serious adverse drug experience when, based upon appropriate medical judgment, they may jeopardize the patient or subject and may require medical or surgical intervention to prevent one of the outcomes listed in this definition.</li> </ul> <p>*** Possibly related to cGVHD.</p> |                  |                  |

**Supplement Figure 2. Lee Symptom Score (LSS) at baseline and 6-month endpoint**

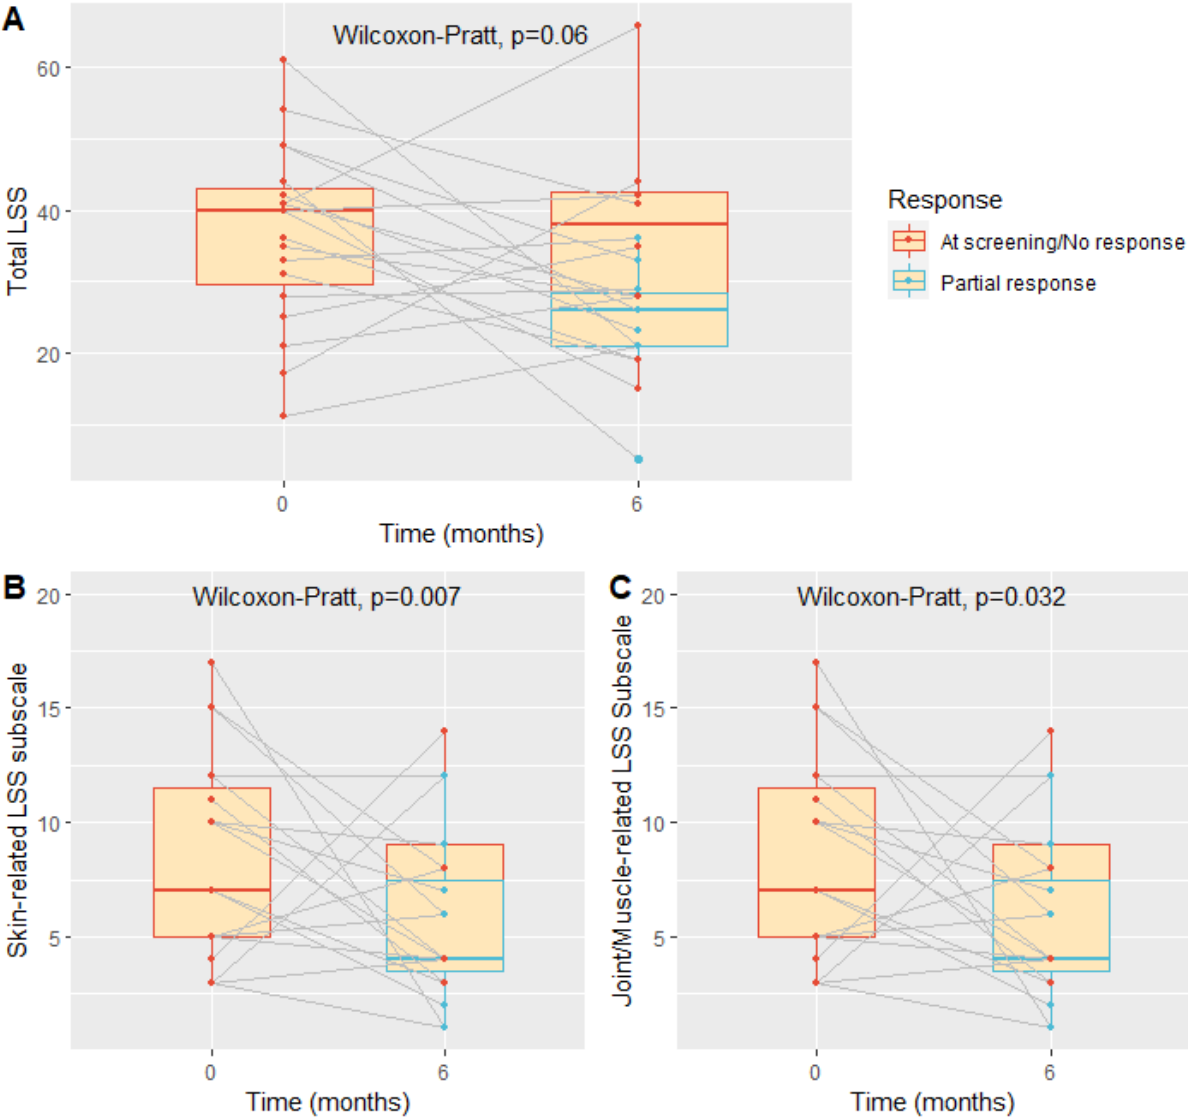

Supplement Figure 2. (A) Total Lee Symptom Scale (LSS) at baseline and 6-month endpoint represented by box-plot mean and dots stratified with color representing values at screening and non-responders at 6-months (red) and responder at 6-months (green). (B) Skin-related LSS subscale for same subjects on same time-points. (C) Muscle/Joints-related LSS subscale for same subjects on same time points. Comparison was done with Wilcoxon test Pratt modification for tied values.

### Supplement Figure 3. Patient reported outcomes – trajectories during the study treatment

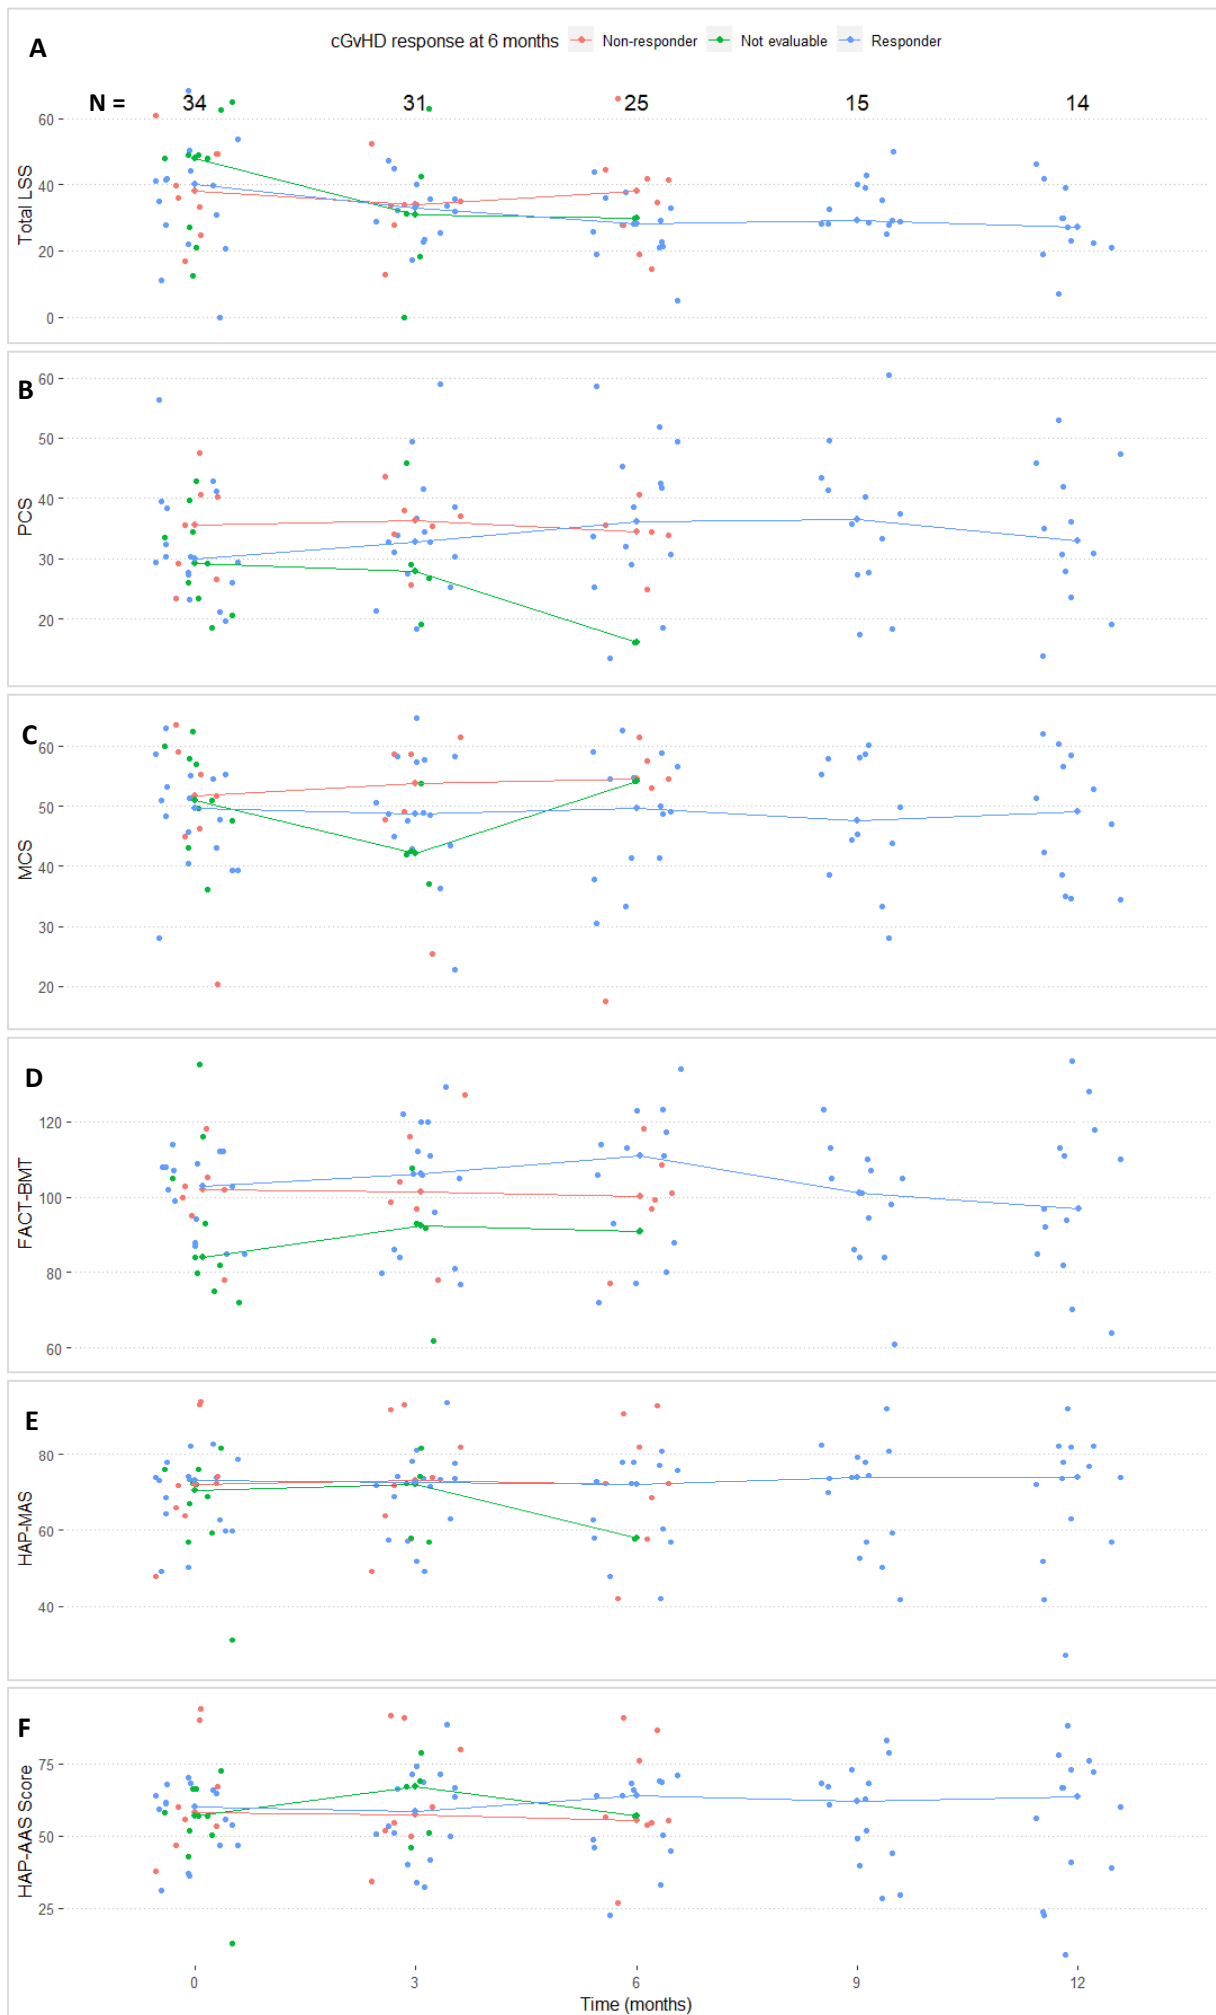

Supplement Figure 3. Combined line/dot plot represents trajectories of patient reported outcomes (PRO) stratified by chronic graft-versus-host disease (cGVHD) response at 6-month endpoint. Lines represent trajectories of PROs median values with dots representing values of every patient with available data at specified time point. Blue color represents patients who achieved partial response, red, patients who did not achieve response and green, patients who were not evaluable for cGVHD response at 6-month endpoint. Numbers at the top of figure represent numbers of patients with available data at corresponding time point. (A) Total Lee Symptom Score. (B) Short Form – 36 (SF-36) Physical Component Summary (PCS) represents subscale for physical functioning. (C) SF-36 Mental Component Summary (MCS) represents mental functioning subscale. (D) Functional Assessment of Cancer Therapy - Bone Marrow Transplant represents measurement of quality of life in bone marrow transplant patients. (E) Human Activity Profile (HAP) – Maximum Activity Score (MAS) and (F) HAP – Adjusted Activity Score (AAS) are self-report measures of energy expenditure or physical fitness.

### Supplement Figure 4. Patient reported outcomes – Short Form-36

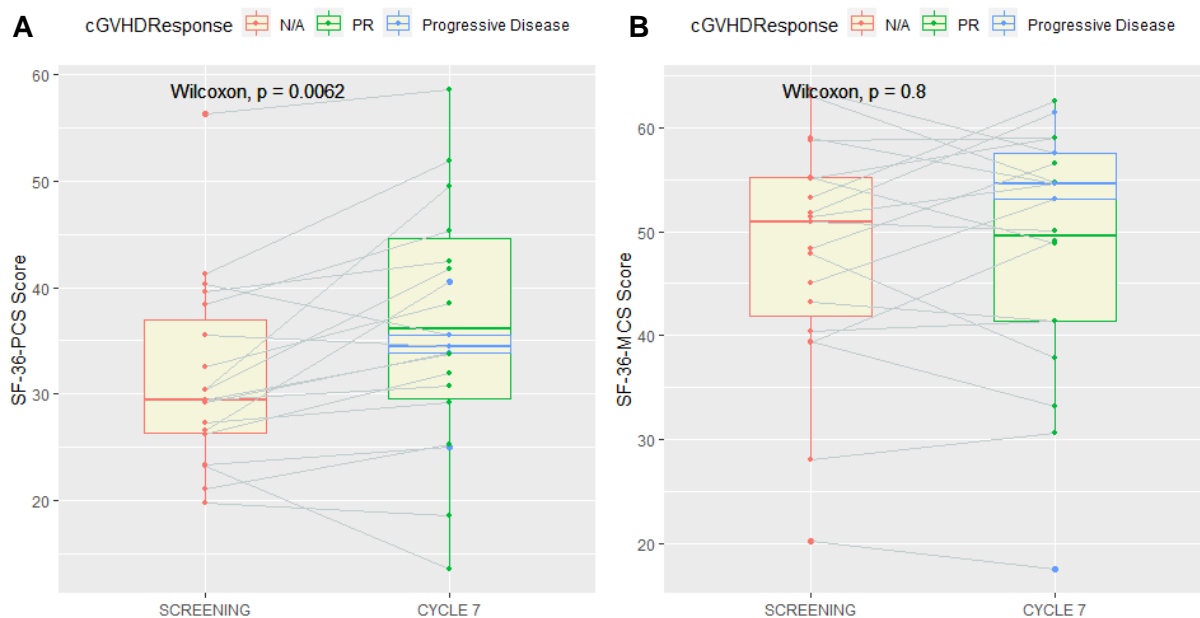

Supplement Figure 4. Health-related quality of life measured by Short Form-36 (SF-36) physical (PCS) and mental (MCS) component scores. Of 24 evaluable patients for ORR at 6-month endpoint, 19 patients (14 responders and 5 non-responders) were evaluable for SF-36 physical component score (PCS) and mental component score (MCS). (A) Median SF-36-PCS of 29.48 (19.79-56.29) at screening was increased on 6-month endpoint to a median of 34.44 (13.53-58.60,  $p = 0.062$ ). Fourteen responders had median SF-36-PCS 29.92 (19.79-56.29) at enrollment and 36.17 (13.53-58.60) at 6-month endpoint. Five non-responders had median SF-36-PCS at corresponding time points 29.15 (23.36-40.32) and 34.44 (24.99-40.58), respectively. (B) Median change in SF-36-MCS was almost unchanged.



**Supplement Figure 5. Patient reported outcomes – Functional Assessment of Cancer Therapy – Bone Marrow Transplant (FACT-BMT)**

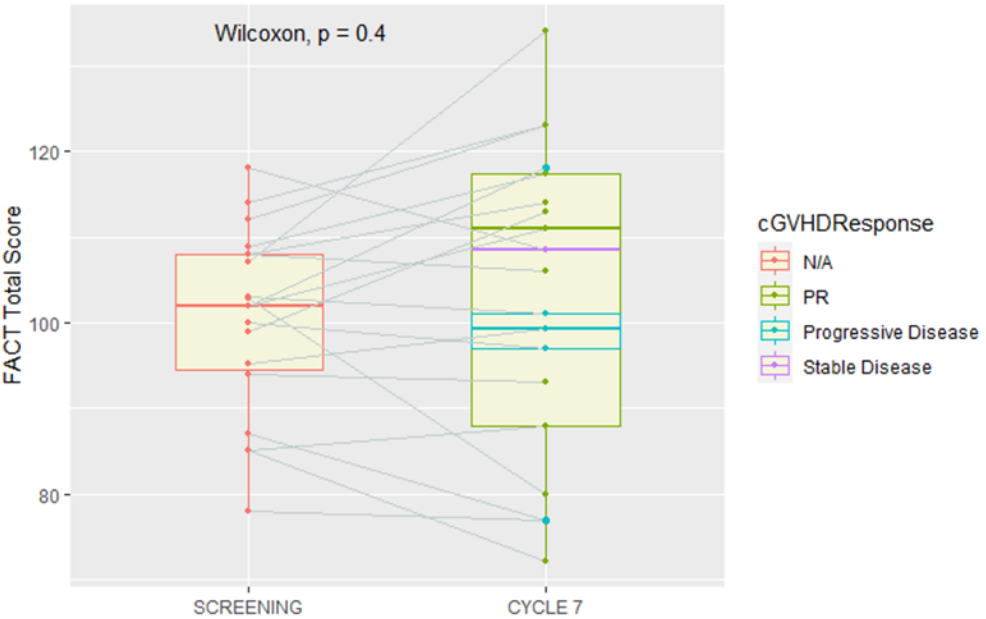

Supplement Figure 5. FACT-BMT scores were available for 13 responders and 6 non-responders at enrollment and 6-month endpoint. For all 19 patients, median total score at screening was 102 (78-118) and 106 (72-134) at 6-month endpoint. Responders had clinically meaningful increase in median total FACT-BMT score from baseline to 6-month time point (102.8 [85-114] versus 111 [72-134], respectively) compared to clinically unmeaningful change in non-responders (101 [78-118] versus 100.2 [77-118], respectively).

**Supplement Figure 6. Patient reported outcomes – Human Activity Profile (HAP)**

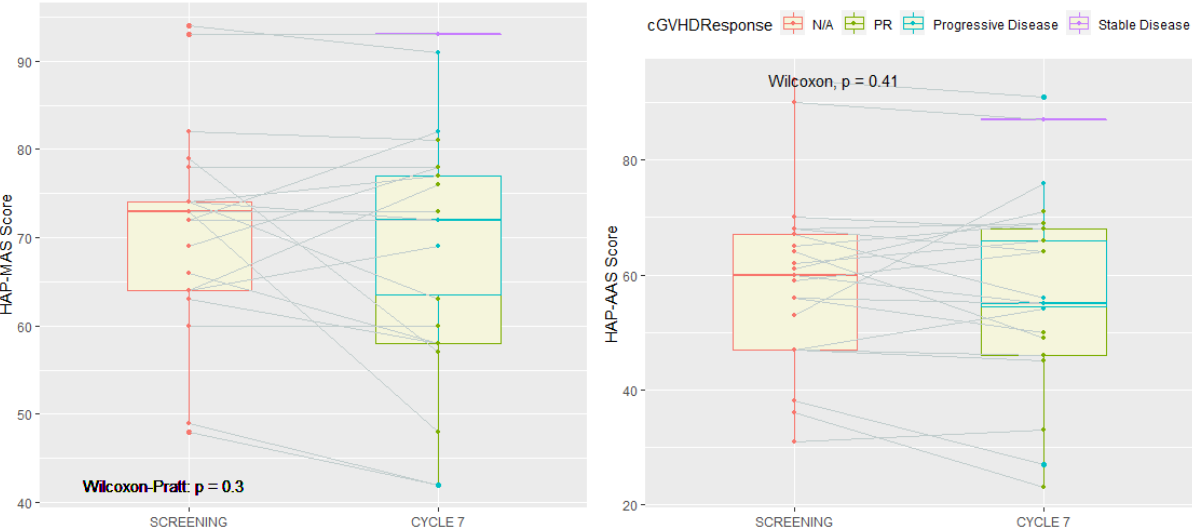

Supplement Figure 6. Twenty-one of 24 evaluable patients were evaluable by Human Activity Profile (HAP) measures. (A) Median value for HAP maximum activity (MAS) and (B) adjusted activity (AAS) scores at enrollment were 73 (48-94) and 60 (31-94), respectively. The same scores at 6-month endpoint were (A) 72 (42-93) and (B) 56 (23-91), respectively ( $p > 0.3$ ). There were no significant changes in scores in group of responders or non-responders.

**Supplement Figure 7. Pharmacokinetics of pomalidomide at different dose levels**

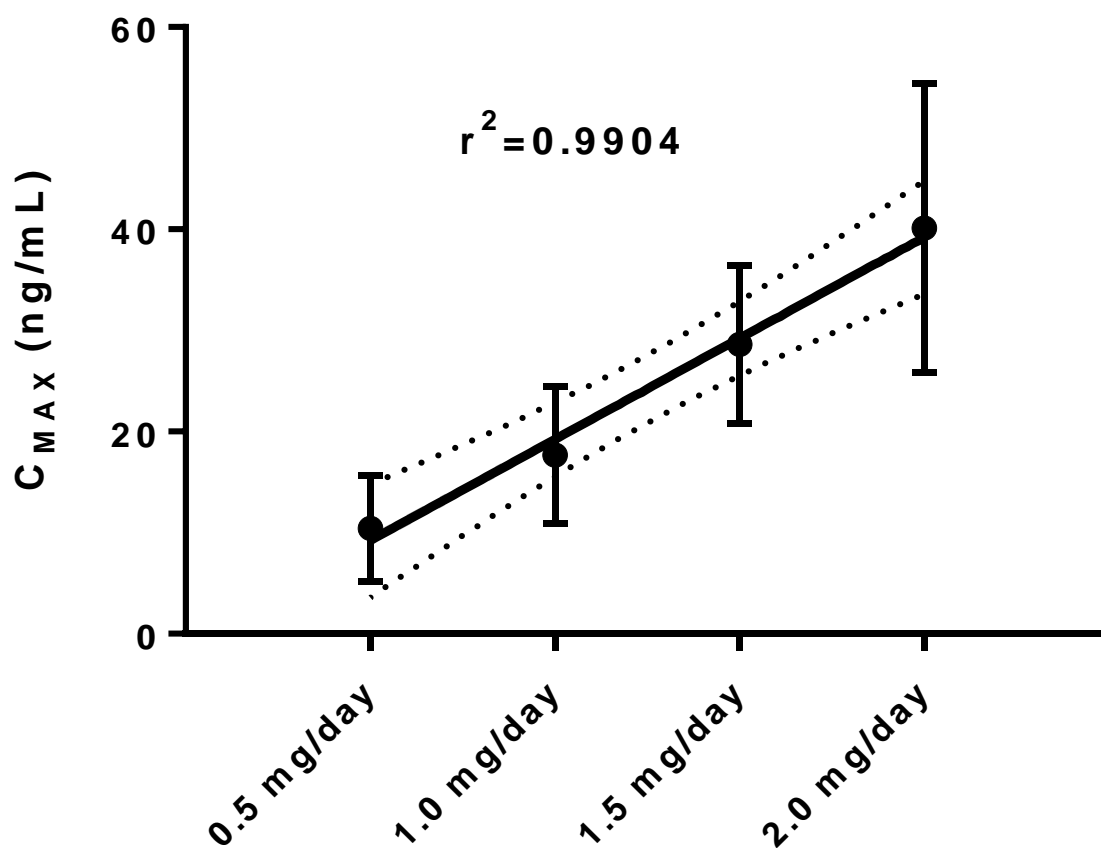

Supplement Figure 7. Pomalidomide peak plasma concentrations in patients at different dose levels increasing in a dose-proportional manner. Depicted are linear regression model +/- 95% confidence interval.

**Supplement Table 9. Pharmacokinetics**

|                                | 0.5 mg                     | 1.0 mg                   | 1.5 mg                   | 2.0 mg                   |
|--------------------------------|----------------------------|--------------------------|--------------------------|--------------------------|
| Trough <sup>2</sup><br>(ng/mL) | 1.41<br>± 1.76<br>(n=154)* | 1.56<br>± 2.27<br>(n=17) | 2.11<br>± 2.58<br>(n=18) | 4.14<br>± 3.19<br>(n=69) |
| Peak<br>(ng/mL)                | 10.4<br>± 5.28<br>(n=156)  | 17.7<br>± 6.75<br>(n=17) | 28.6<br>± 7.84<br>(n=15) | 40.1<br>± 14.3<br>(n=66) |

<sup>2</sup> Many Trough samples at each dose were D1 pre-dose samples on every cycle  
Values expressed as arithmetic mean ± standard deviation with number of measurements made at that dose in parentheses
